# Supplementary material for: Improvement of the photo-bias stability of the Zn–Sn–O field effect transistors by an ozone treatment
Source: Royal Society of Chemistry journal article supplement (doi:10.1039/c2jm30242j), 2012-01-01
Supplement: c2jm30242j.pdf [file c2jm30242j.pdf]

## Supporting Information

### Improvement of the Photo-bias Stability of the Zn-Sn-O Field Effect Transistors by an Ozone Treatment

*Bong Seob Yang,<sup>1</sup> Sanghyun Park, Seungha Oh,<sup>1</sup> Yoon Jang Kim,<sup>1</sup>*

*Jae Kyeong Jeong,<sup>2\*</sup> Cheol Seong Hwang,<sup>1</sup> and Hyeong Joon Kim<sup>1\*</sup>*

<sup>1</sup> WCU Hybrid Materials Program, Department of Materials Science and Engineering,  
and Inter-university Semiconductor Research Center, Seoul National University, Seoul  
151-744, Korea

<sup>2</sup>Department of Materials Science and Engineering, Inha University, Incheon 402-751,  
Korea

#### **Corresponding Author:**

AUTHOR EMAIL ADDRESS: J. K. Jeong ([jkjeong@inha.ac.kr](mailto:jkjeong@inha.ac.kr)); H. J. Kim  
([hjkim@plaza.snu.ac.kr](mailto:hjkim@plaza.snu.ac.kr))

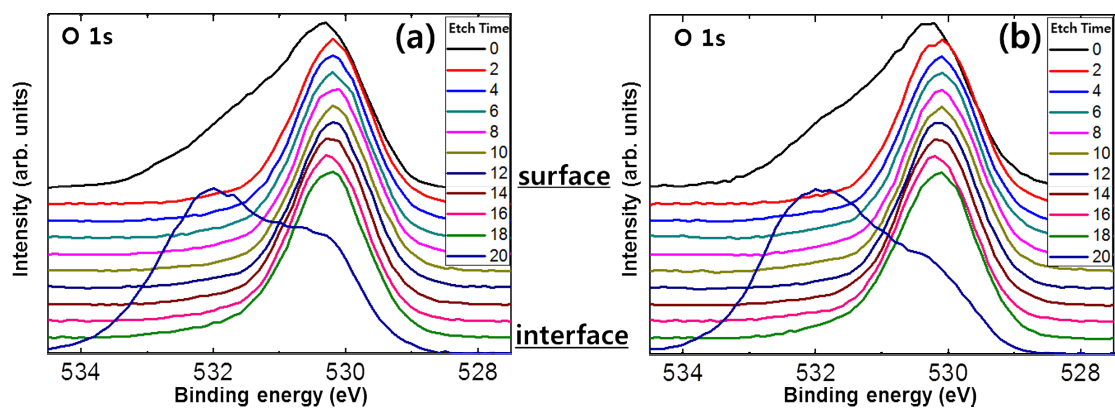

**Figure S1.** Depth profiling of O *1s* XPS spectra of (a) untreated and (b) 300 s ozone treated ZTO films.

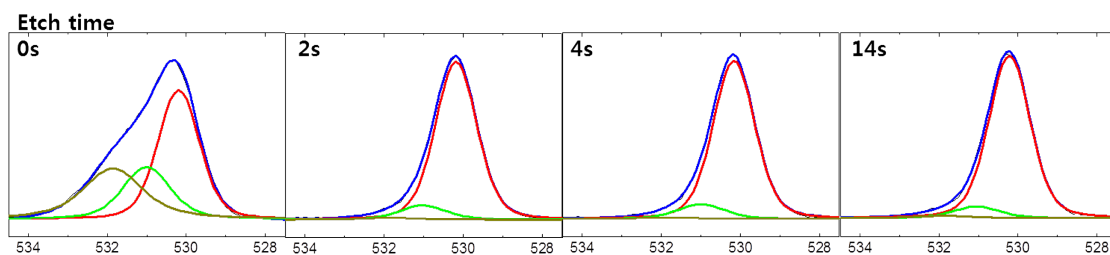

(a) Untreated ZTO film

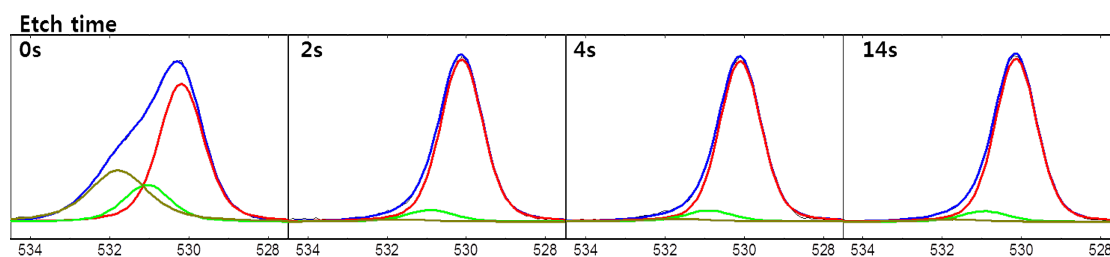

(b) 300 s ozone treated ZTO film

**Figure S2.** The evolution of deconvoluted O 1s XPS spectra for the untreated and 300 s ozone treated ZTO films.

**Table S1.** Comparison of portions of the O 1s peaks deconvoluted from the XPS spectra of the untreated and 300 s-treated ZTO films as a function of XPS etch time.

(a) Untreated ZTO film

| XPS<br>Etch time | O 1s peak [ eV ]                  |                              |                      |
|------------------|-----------------------------------|------------------------------|----------------------|
|                  | Lattice Oxygen<br>(530.20 ± 0.04) | Oxygen deficient<br>(531.06) | Hydroxyl<br>(531.89) |
| 0s               | 0.549                             | 0.224                        | 0.227                |
| 2s               | 0.885                             | 0.098                        | 0.017                |
| 4s               | 0.887                             | 0.099                        | 0.013                |
| 14s              | 0.901                             | 0.077                        | 0.021                |

(b) 300 s ozone treated ZTO film

| XPS<br>Etch time | O 1s peak [ eV ]                  |                              |                      |
|------------------|-----------------------------------|------------------------------|----------------------|
|                  | Lattice Oxygen<br>(530.20 ± 0.04) | Oxygen deficient<br>(531.06) | Hydroxyl<br>(531.89) |
| 0s               | 0.551                             | 0.159                        | 0.289                |
| 2s               | 0.901                             | 0.077                        | 0.021                |
| 4s               | 0.901                             | 0.075                        | 0.024                |
| 14s              | 0.904                             | 0.073                        | 0.023                |
